# Supplementary material for: A relation based measure of semantic similarity for Gene Ontology annotations
Source: Springer Nature journal article supplement (doi:10.1186/1471-2105-9-468), 2008-11-04

**Average Similarity Values Inside and Outside Pathways - All Terms (CC, BP and MF)**

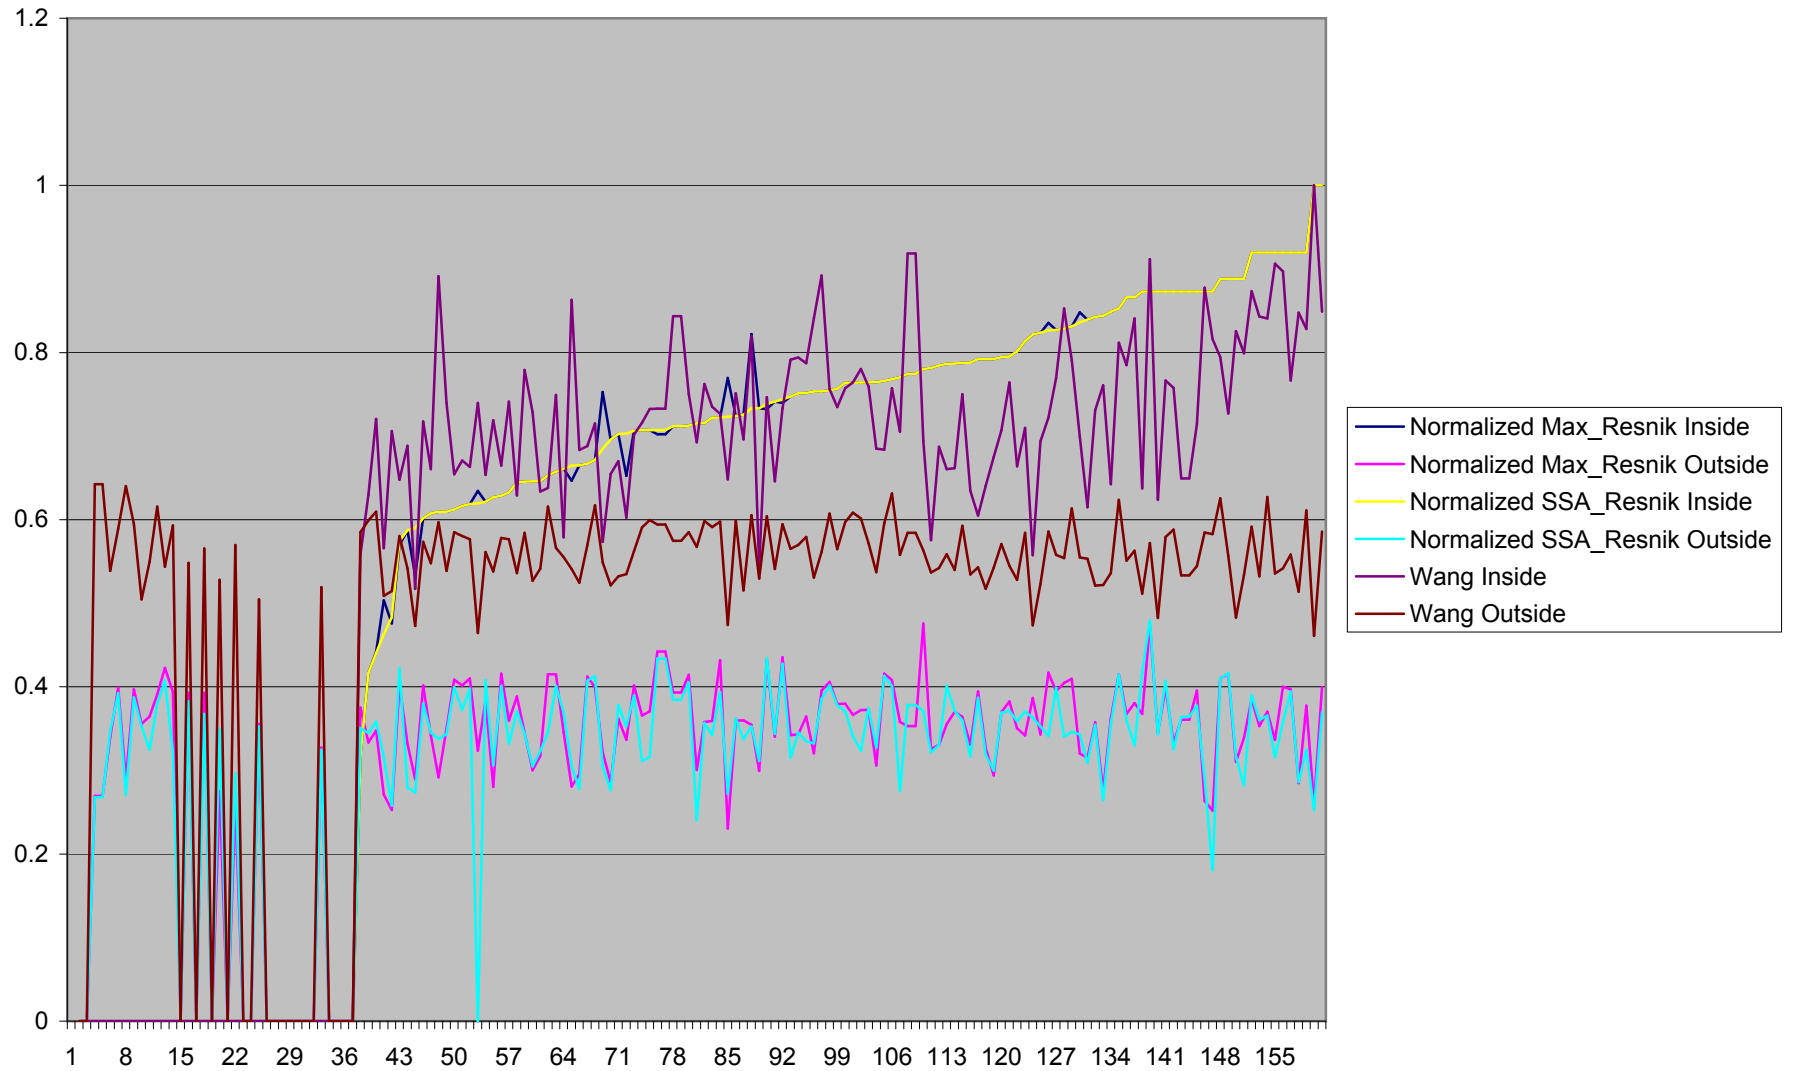

Supplement: 12859_2008_2453_MOESM4_ESM.pdf [file 12859_2008_2453_MOESM4_ESM.pdf]
